# Supplementary material for: The E3 SUMO ligase PIASγ is a novel interaction partner regulating the activity of diabetes associated hepatocyte nuclear factor-1α
Source: PubMed Central journal article supplement (PMC6109179; doi:10.1038/s41598-018-29448-w), 2018-08-24

**The E3 SUMO ligase PIAS $\gamma$  is a novel interaction partner regulating the activity of diabetes associated hepatocyte nuclear factor-1 $\alpha$**

**Alba Kaci, Magdalena Keindl, Marie H. Solheim, Pål R. Njølstad, Lise Bjørkhaug and Ingvild Aukrust**

**Supplementary Information**

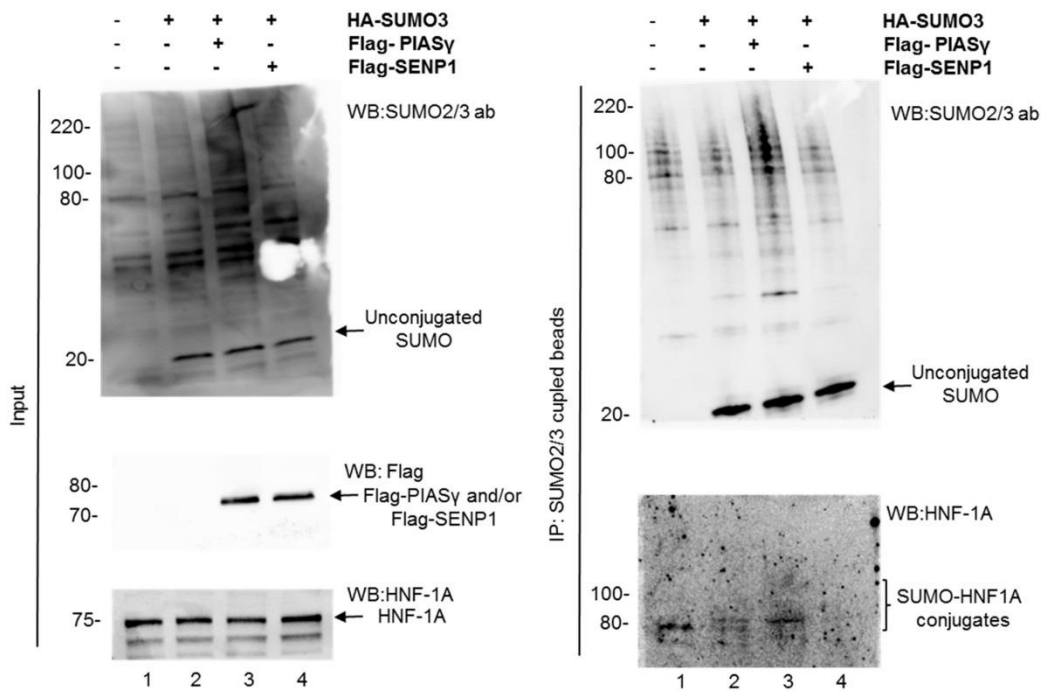

**Figure S1. Endogenous mouse Hnf-1a in MIN6 cells is also a target of SUMO-3 modification.** SUMOylation of endogenous mouse Hnf-1a analyzed in MIN6 cells transiently transfected with HA-tagged SUMO-3, and/or Flag-tagged PIAS $\gamma$  and Flag-tagged SENP1. Cells were lysed in the presence of N-Ethylmaleimide and protease inhibitors, and subjected to immunoprecipitation using anti-SUMO2/3 coupled beads. The precipitate (right panel) and input (left panel) samples were separated by SDS-PAGE and analyzed by immunoblotting using anti-SUMO2/3, anti-HNF-1A and anti-Flag antibodies. This experiment was performed once (n=1).

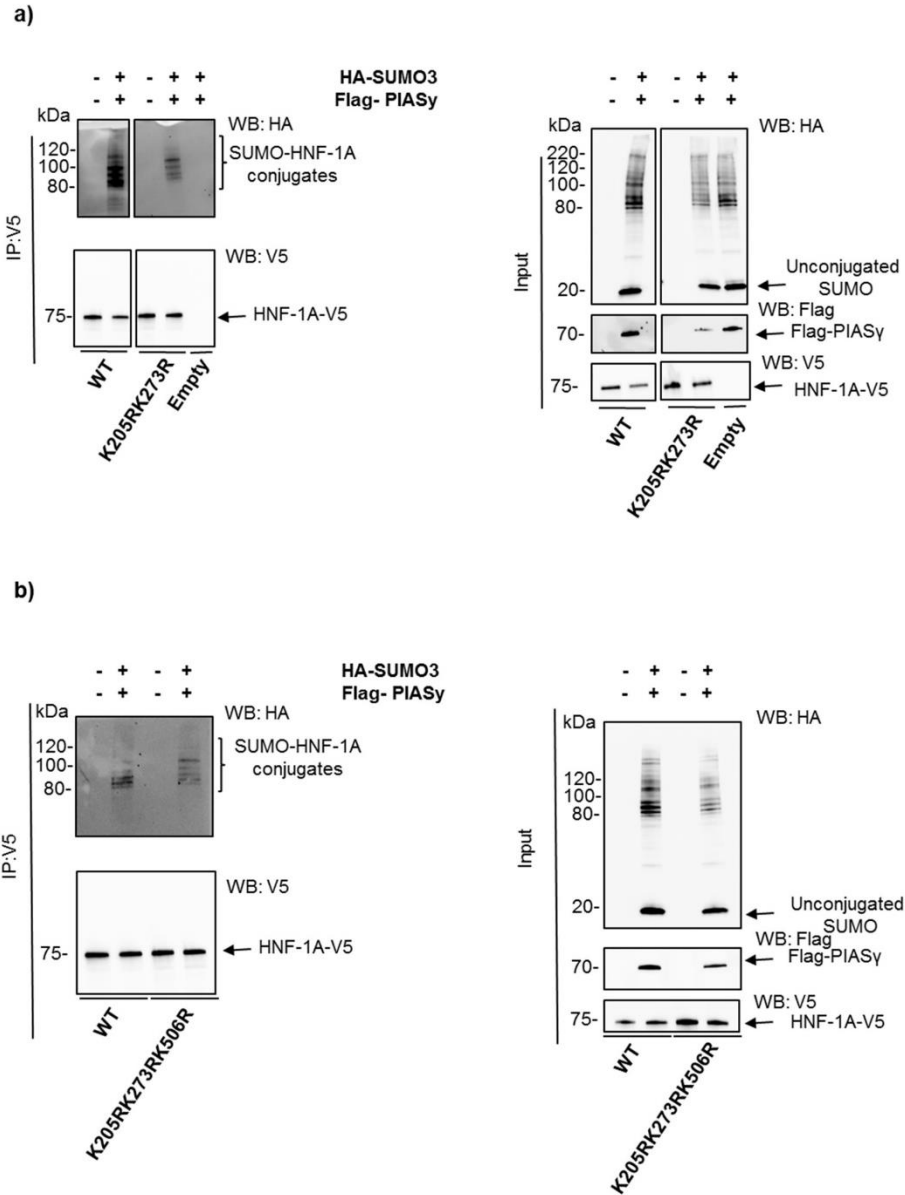

**Figure S2. Combines loss of residues K205, K273 and/or K506 resulted in reduced SUMOylation upon lysine (K) to arginine (R) substitution. (a and b) Cells were transfected with V5-tagged HNF-1A (WT or mutants) together with HA-tagged SUMO-3 and Flag-tagged PIAS $\gamma$ . Lysates were collected in the presence of NEM and protease inhibitors and subjected to immunoprecipitation using anti-V5 antibody. The precipitates were separated by SDS-PAGE and analyzed by immunoblotting using anti-HA and anti-V5 antibodies. This experiment was performed once (n=1).**

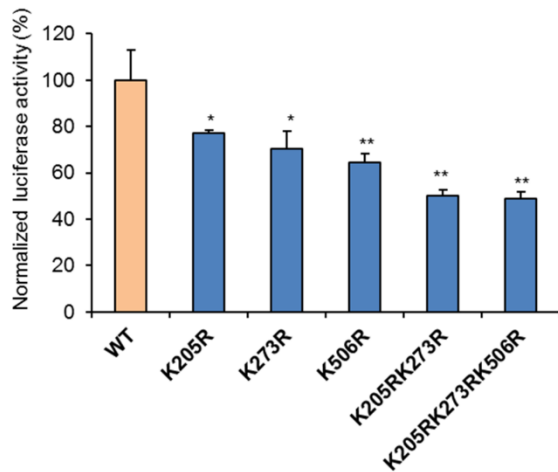

**Figure S3. Loss of K205, K273 and K506 (to arginine) modulate negatively the activity of HNF-1A.** MIN6 cells were transiently transfected with V5-tagged WT, single mutants (K205R, K273R, K506R), double mutant (K205RK273R) and triple mutant (K205RK273RK506R) individually, and co-transfected with reporter plasmids pGL3-RA and pRLSV40. Firefly luciferase activity was measured in cell lysates and normalized to Renilla luciferase expression. Each bar represents the mean nine readings  $\pm$ SD; three parallel readings were conducted on each of three experimental days (n = 3). Measurements are given in fold activity relative to WT. \* Indicates  $p < 0.05$ , \*\* indicates  $p < 0.001$ .

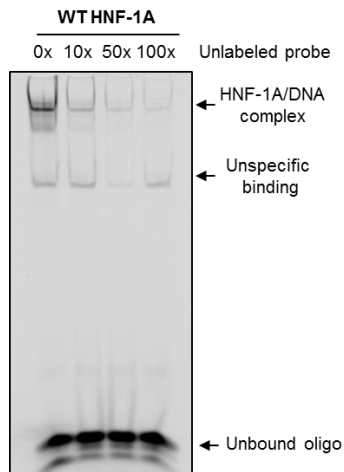

**Figure S4. EMSA competition assay with unlabeled oligo.** Nuclear fractions obtained from HeLa cells transiently transfected with WT HNF-1A were incubated with increasing amounts of unlabeled DNA oligo corresponding to the HNF-1 binding site in the rat albumin promoter. Bound complexes were analyzed by EMSA, on a 6% DNA retardation gel and the fluorescence signal was detected at 670 nm.

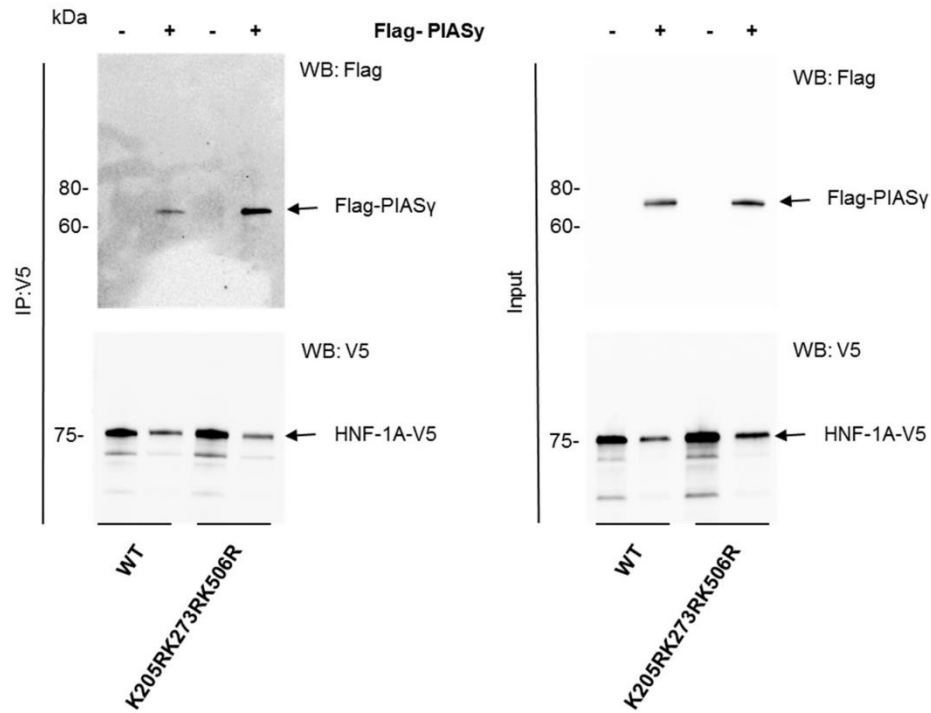

**Figure S5. The trippel mutant K205RK273RK506R does not affect the binding of PIAS $\gamma$  to HNF-1A.** HEK293 cells were transiently transfected with WT HNF1A, mutant K205RK273RK506R, together with Flag-tagged PIAS $\gamma$ . Cells were lysed and subjected to immunoprecipitation using anti-V5 antibody. The precipitates (left) and 10  $\mu$ g input (right) were separated by SDS-PAGE and analyzed by immunoblotting using anti-Flag and anti-V5 antibodies. This experiment was performed once (n=1).

**Table S1. Site directed mutagenesis primer sequences.**

| Primers       | Sequence                                |
|---------------|-----------------------------------------|
| K46R_forward  | 5'-GAAGGCCCCCTGGACAGGGGGGAGTCCTGCGGC-3' |
| K46R_reverse  | 5'-GCCGCAGGACTCCCCCTGTCCAGGGGGCCTTC-3'  |
| K158R_forward | 5'-TCCCATGAAGACGCAGAGGCGGGCCGC-3'       |
| K158R_reverse | 5'-GCGGCCCGCCTCTGCGTCTTCATGGGA-3'       |
| K205R_forward | 5'-CGGAGGAACCGTTTCAGGTGGGGCCCAG-3'      |
| K205R_reverse | 5'-CTGGGCCCCACCTGAAACGGTTCCTCCG-3'      |
| K222R_forward | 5'-GCCTATGAGAGGCAGAGGAACCCTAGCAAGGAG-3' |
| K222R_reverse | 5'-CTCCTTGCTAGGGTTCCTCTGCCTCTCATAGGC-3' |
| K273R_forward | 5'-GTTTGCCAACCGGCGCAGAGAAGAAGCCTTCC-3'  |
| K273R_reverse | 5'-GGAAGGCTTCTTCTCTGCGCCGGTTGGCAAAC-3'  |
| K506R_forward | 5'-CTCTACAGCCACAGGCCCGAGGTGGCC-3'       |
| K506R_reverse | 5'-GGCCACCTCGGGCCTGTGGCTGTAGAG-3'       |

**Figure S3: Full scans of blots from main text Figure 1a.**

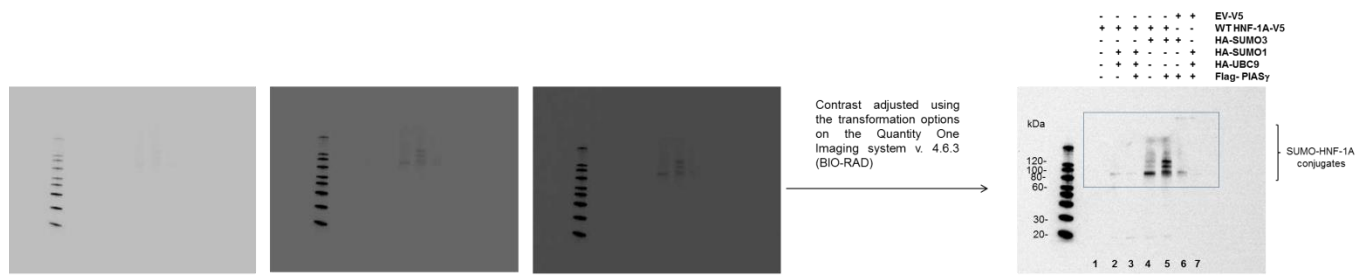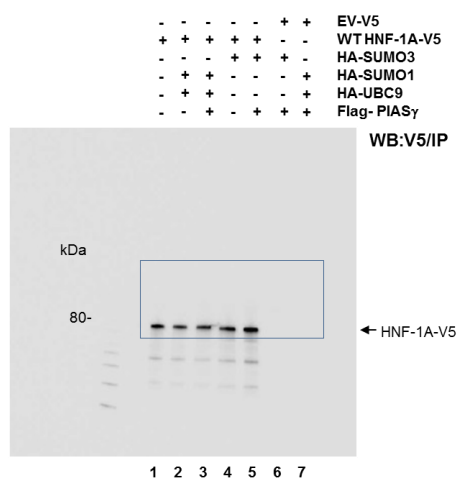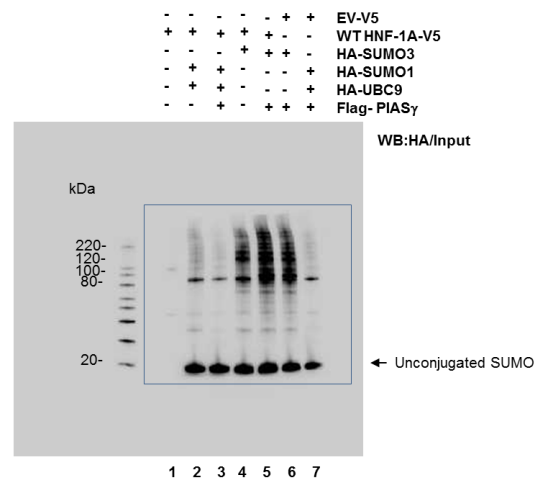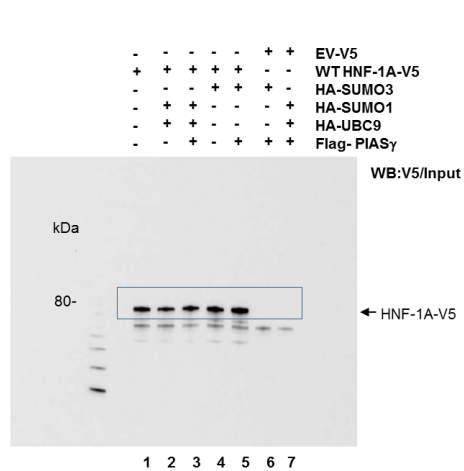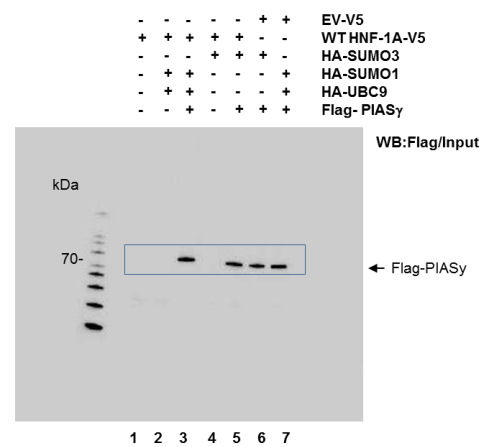



**Figure S4: Full scans of blots from main text Figure 1b.**

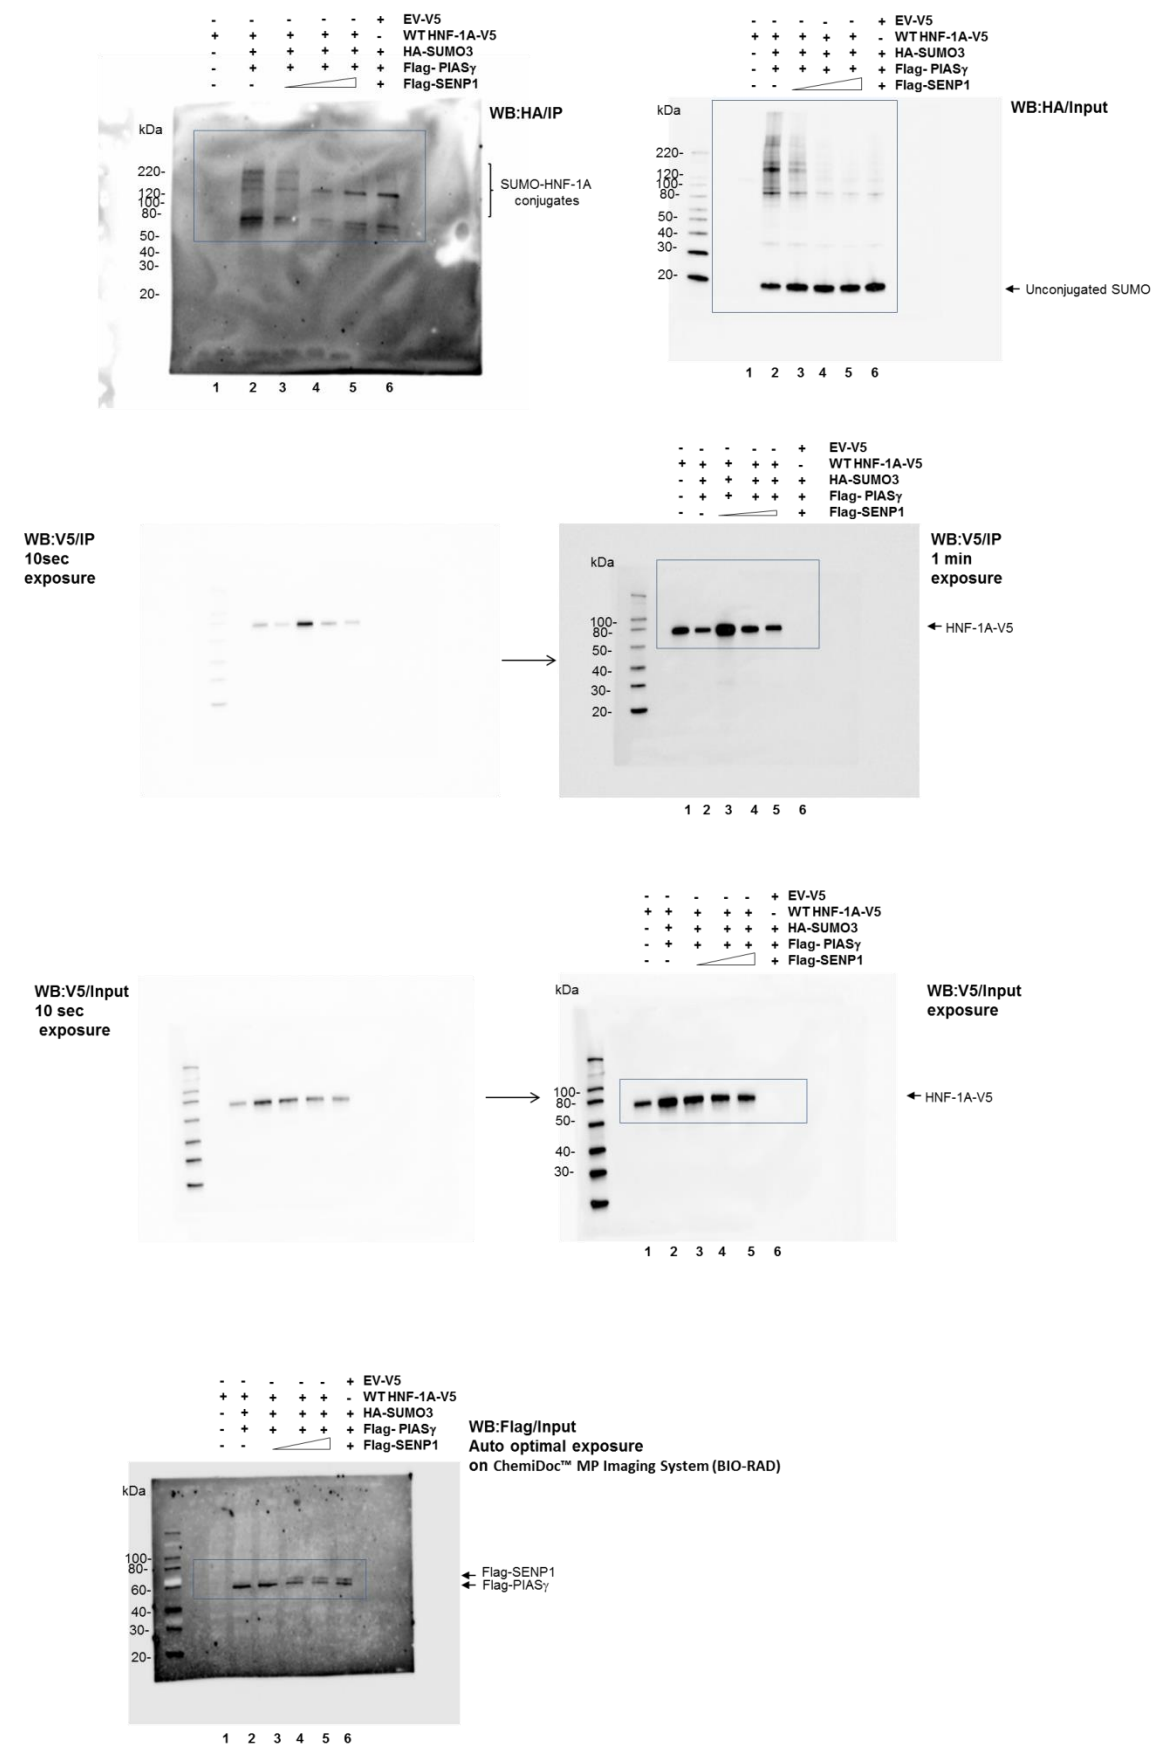

**Figure S5: Full scans of blots from main text Figure 2b.**

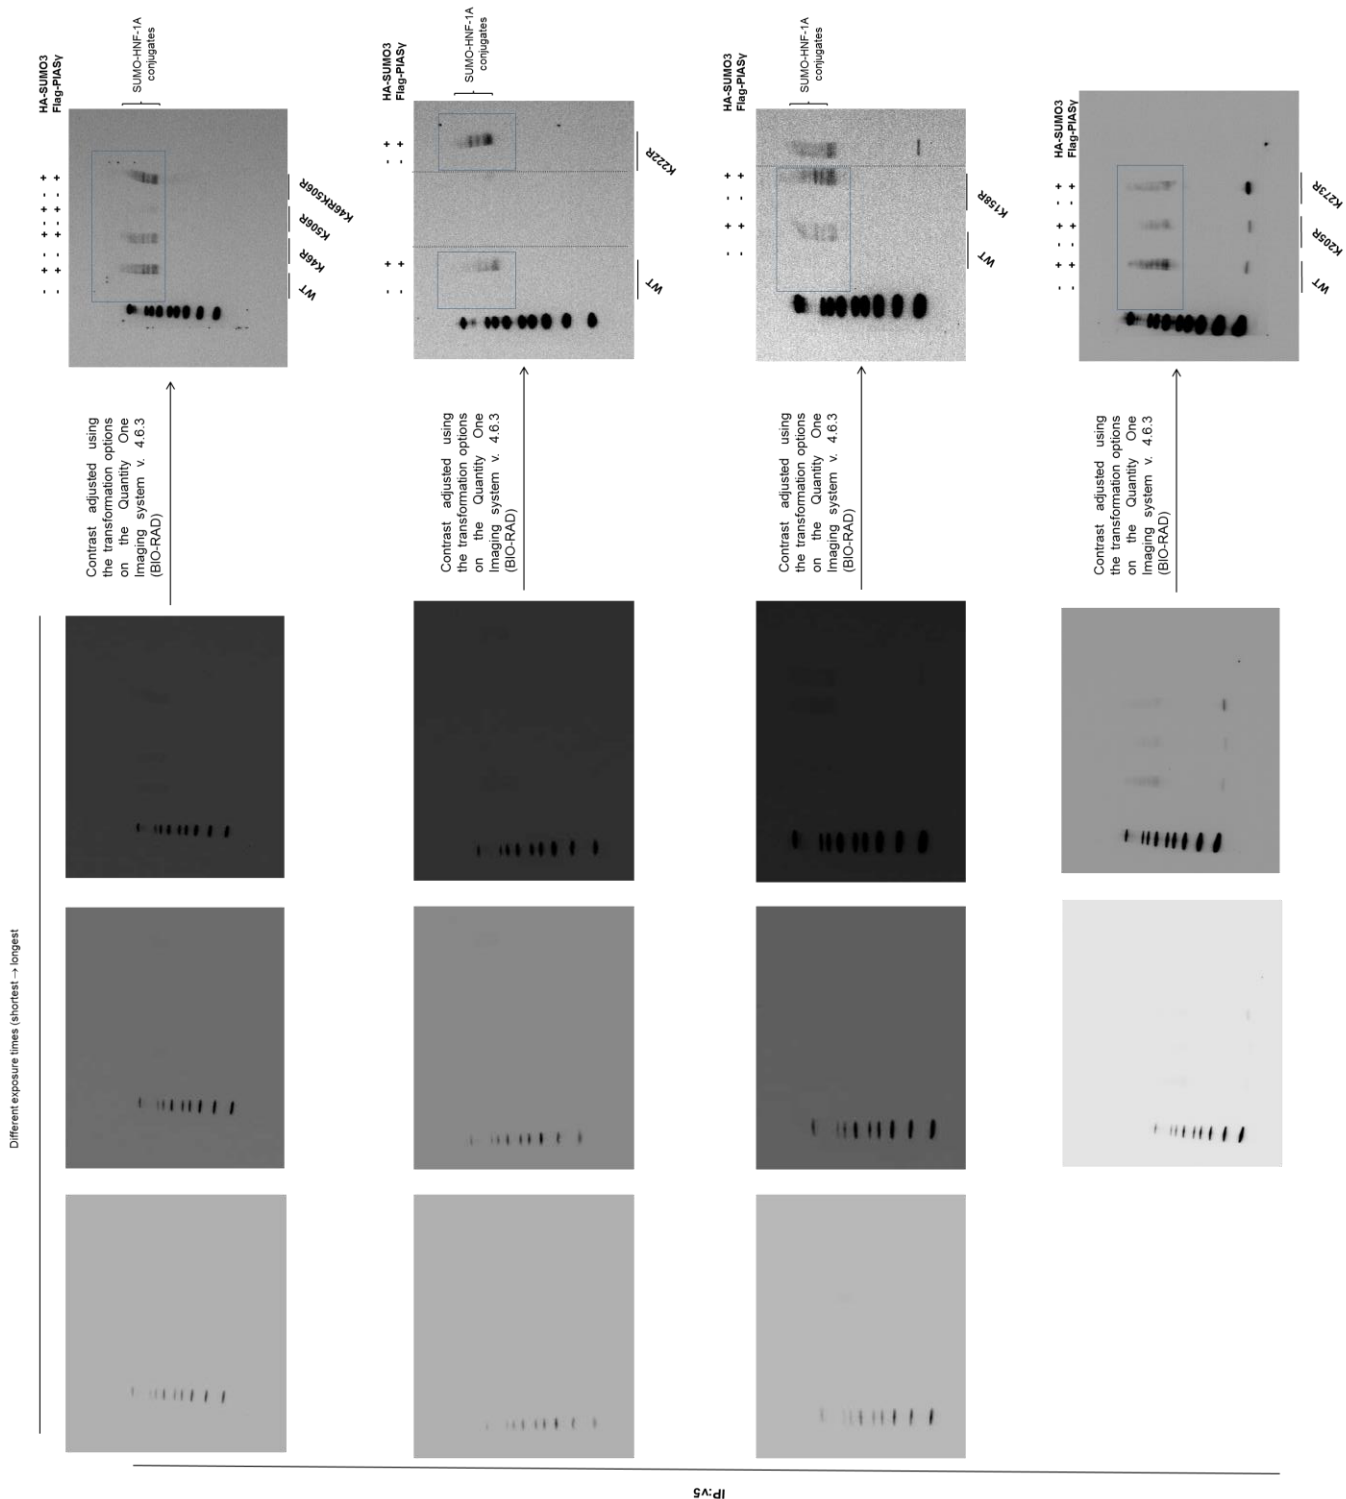

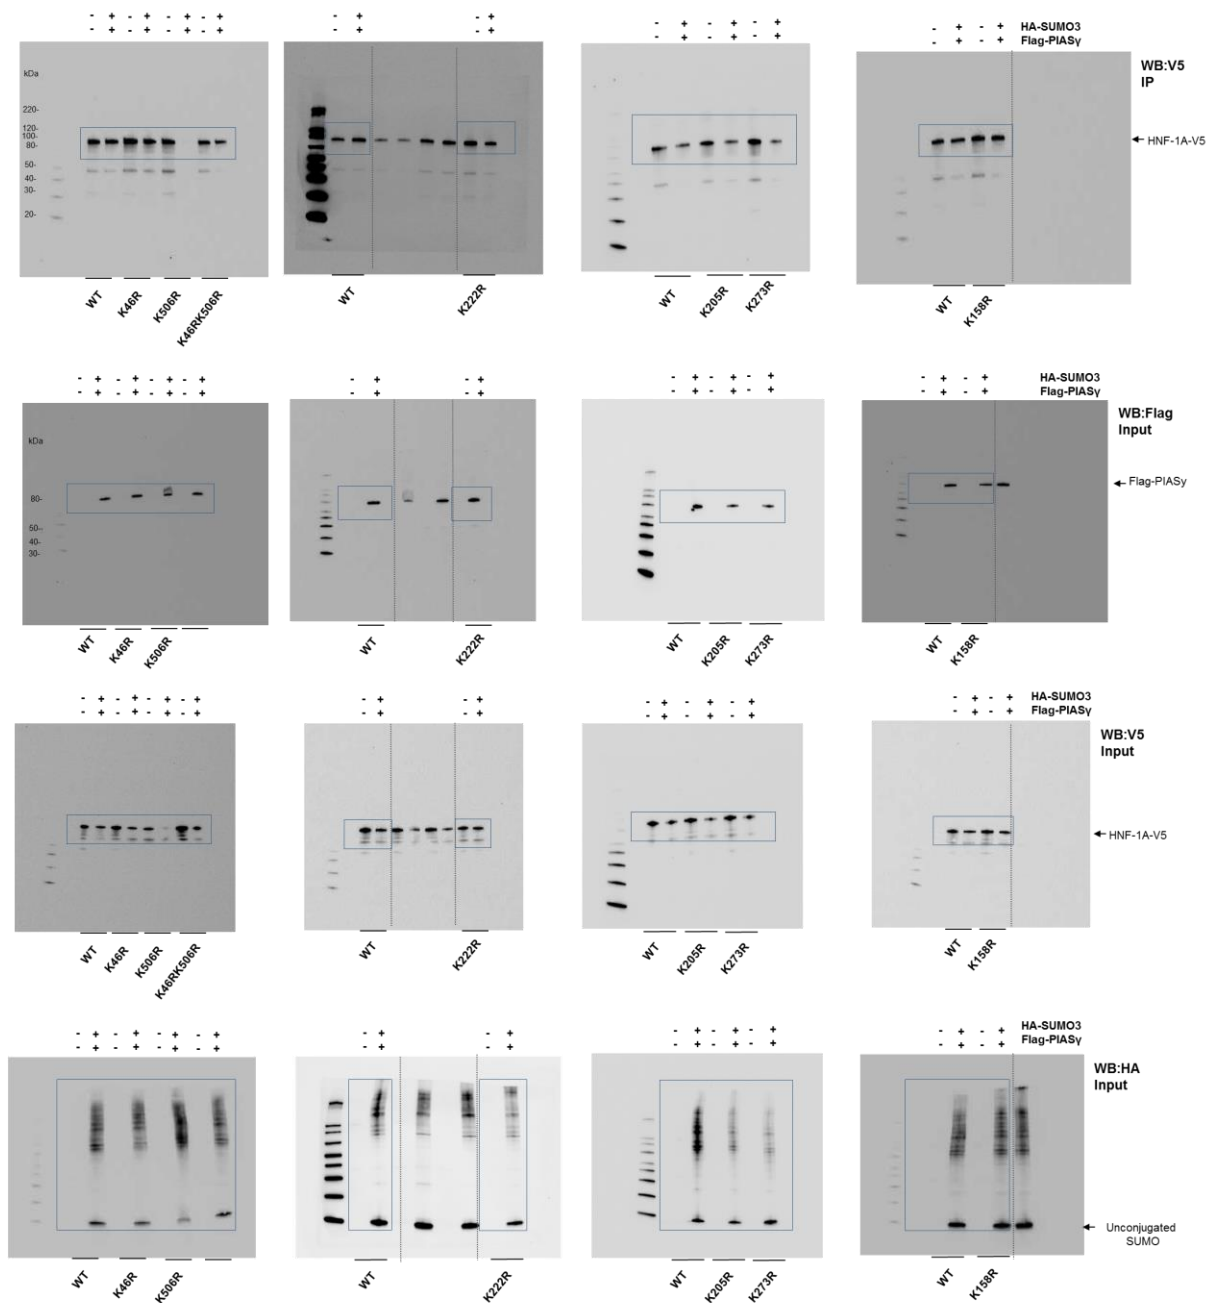

**Figure S6: Full scans of blots from main text Figure 4a.**

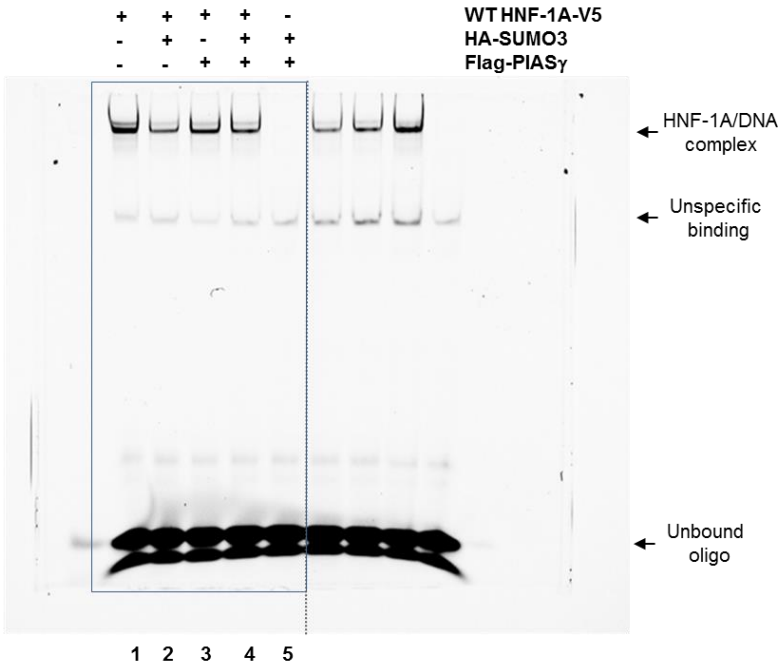



**Figure S8: Full scans of blots from main text Figure 6.**

a)

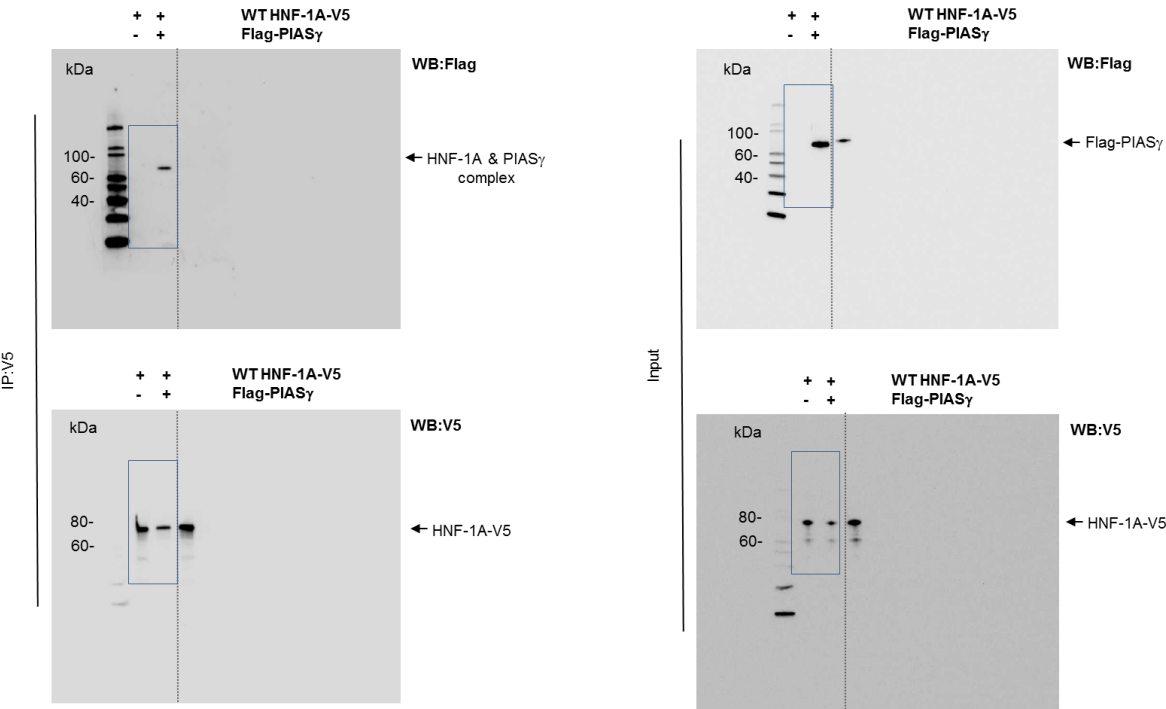

b)

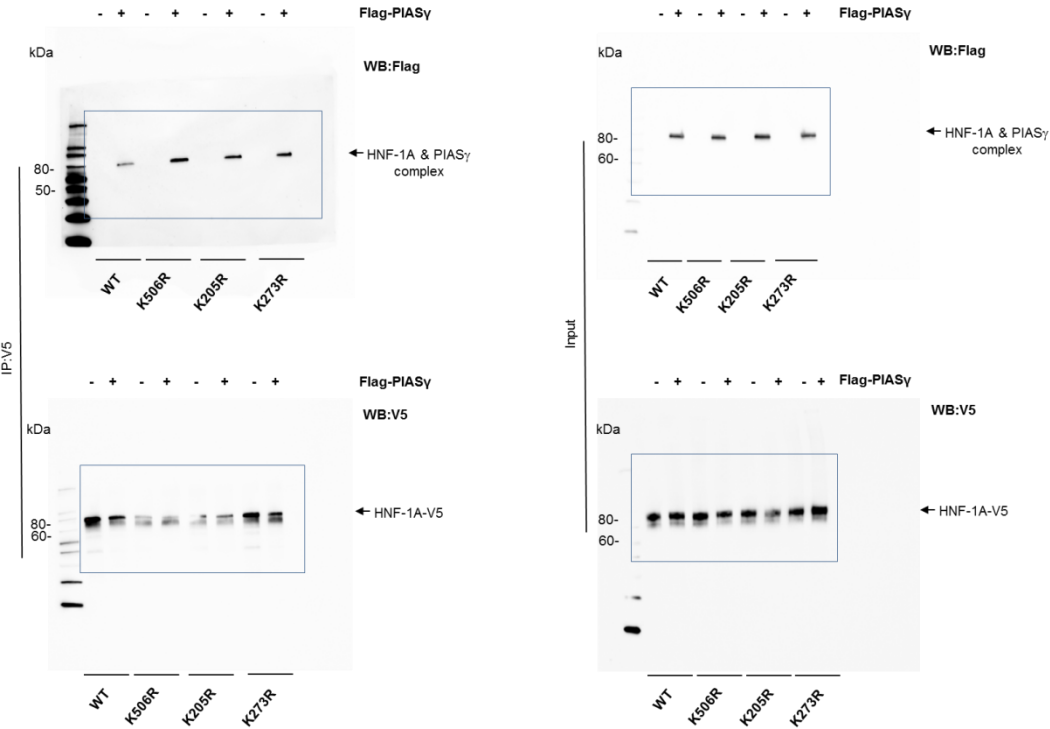

**Figure S9: Full scans of blots from main text Figure 7a.**

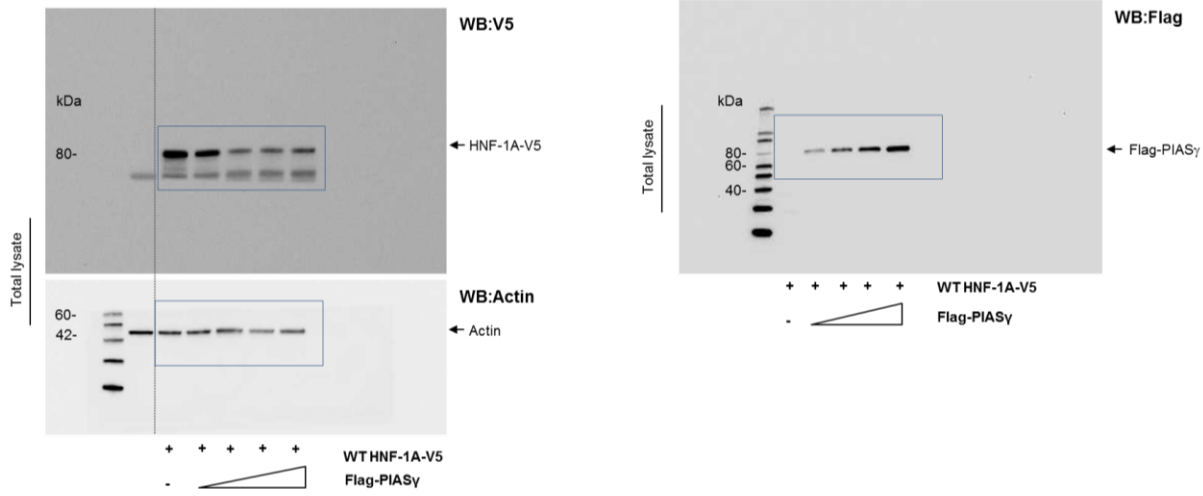

**Figure S10: Full scans of blots from main text Figure 7c.**

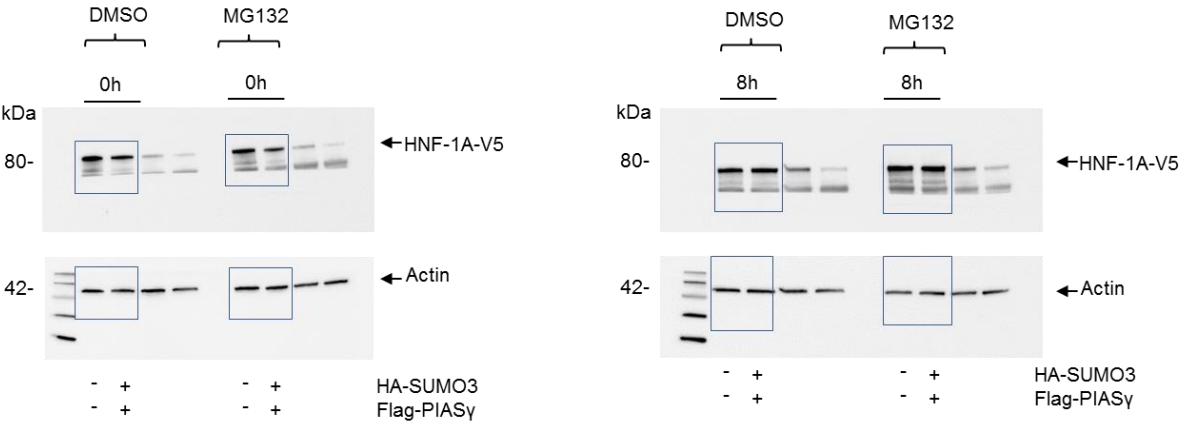

**Figure S11: Full scan blots from main text Figure 8a.**

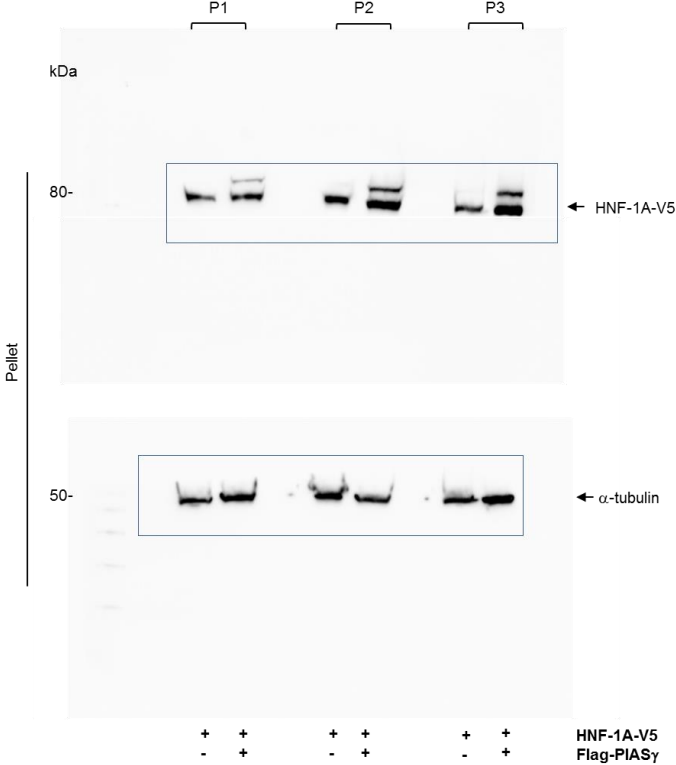

Supplement: 41598_2018_29448_MOESM1_ESM.pdf [file 41598_2018_29448_MOESM1_ESM.pdf]
